# Supplementary material for: Prognostic Immune Cell Profiling of Malignant Pleural Effusion Patients by Computerized Immunohistochemical and Transcriptional Analysis
Source: PubMed Central journal article supplement (PMC6966627; doi:10.3390/cancers11121953), 2019-12-05
Supplement: cancers-11-01953-s001.pdf [file cancers-11-01953-s001.pdf]

# Supplementary Materials: Prognostic Immune Cell Profiling of Malignant Pleural Effusion Patients by Computerized Immunohistochemical and Transcriptional Analysis

**Table S1.** mRNA list and category. NOTE: a, the drug list does not include all available agonists or antagonists for each target.

| Gene name | Common name                        | Category          | Subcategory       | Drug <sup>a</sup>           |
|-----------|------------------------------------|-------------------|-------------------|-----------------------------|
| CD27      | CD27                               | Immunomodulator   | Stimulatory       | Varlilumab                  |
| CD40LG    | CD40 ligand                        | Immunomodulator   | Stimulatory       | SEA-CD40                    |
| GZMB      | Granzyme B                         | Immunomodulator   | Stimulatory       |                             |
| ICOS      | CD278                              | Immunomodulator   | Stimulatory       | GSK3359609                  |
| IL2RB     | IL2 receptor                       | Immunomodulator   | Stimulatory       | Aldesleukin                 |
| TNFRSF4   | OX40                               | Immunomodulator   | Stimulatory       | PF-8600                     |
| TNFRSF9   | 4-1BB                              | Immunomodulator   | Stimulatory       | Utomilumab                  |
| ADORA2A   | Adenosine A2 <sub>A</sub> receptor | Immunomodulator   | Inhibitory        | AZD4635                     |
| BTLA      | BTLA                               | Immunomodulator   | Inhibitory        | preclinical trials          |
| CD274     | PD-L1                              | Immunomodulator   | Inhibitory        | Atezolizumab;<br>Durvalumab |
| CD276     | B7-H3                              | Immunomodulator   | Inhibitory        | Enoblituzumab               |
| CTLA4     | CTLA-4                             | Immunomodulator   | Inhibitory        | Ipilimumab                  |
| FOXP3     | FOXP3                              | Immunomodulator   | Inhibitory        |                             |
| IFNG      | IFN $\gamma$                       | Immunomodulator   | Inhibitory        | Interferon gamma-1b         |
| LAG3      | LAG-3                              | Immunomodulator   | Inhibitory        | Relatlimab                  |
| PDCD1     | PD-1                               | Immunomodulator   | Inhibitory        | Nivolumab;<br>Pembrolizumab |
| TIGIT     | TIGIT                              | Immunomodulator   | Inhibitory        | BMS-986207                  |
| CD19      | CD19                               | Immune cell type  | B cells           |                             |
| MS4A1     | CD20                               | Immune cell type  | B cells           |                             |
| CD8A      | CD8A                               | Immune cell type  | Cytotoxic T cells |                             |
| CD8B      | CD8B                               | Immune cell type  | Cytotoxic T cells |                             |
| PTPRC     | CD45                               | Immune cell type  | Leukocytes        |                             |
| CD163     | CD163                              | Immune cell type  | Macrophages       |                             |
| CD68      | CD68                               | Immune cell type  | Macrophages       |                             |
| CSF3R     | G-CSF-R                            | Immune cell type  | Neutrophils       |                             |
| S100A12   | S100A12                            | Immune cell type  | Neutrophils       |                             |
| FCF1      | FCF1                               | Housekeeping gene |                   |                             |
| ERCC3     | ERCC3                              | Housekeeping gene |                   |                             |
| CNOT4     | CNOT4                              | Housekeeping gene |                   |                             |
| TLK2      | TLK2                               | Housekeeping gene |                   |                             |

**Table S2.** Digitalised image quantification results for immune cell markers and PD-L1 scoring.

| Title                               | Score    | Lung-AC | Breast-AC | Ovarian-Ca | Mesothelioma | GIT-Ca  | Total    |
|-------------------------------------|----------|---------|-----------|------------|--------------|---------|----------|
| CD3 count/mm <sup>2</sup> , median  |          | 216     | 1060      | 139        | 253          | 300     | 394      |
| CD3/CD45 % median                   |          | 23.1    | 41.3      | 27.2       | 33.7         | 19.4    | 29       |
| CD4 count/mm <sup>2</sup> , median  |          | 1324    | 2229      | 1080       | 2180         | 1079    | 1578     |
| CD4/CD45 % median                   |          | 83.4    | 83.4      | 98.2       | 88.1         | 54.2    | 81       |
| CD8 count/mm <sup>2</sup> , median  |          | 70      | 181       | 44         | 89           | 40      | 85       |
| CD8/CD45 % median                   |          | 4.00    | 8.80      | 5.00       | 6.30         | 3.20    | 5        |
| CD20 count/mm <sup>2</sup> , median |          | 36      | 54        | 17         | 44           | 64      | 43       |
| CD20/CD45 % median                  |          | 3.7     | 2         | 3          | 2.8          | 4       | 3        |
| CD45 count/mm <sup>2</sup> , median |          | 2293    | 2353      | 1552       | 2962         | 1897    | 2212     |
| CD68 count/mm <sup>2</sup> , median |          | 700     | 802       | 521        | 1287         | 1192    | 900      |
| CD68/CD45 % median                  |          | 45.5    | 37.1      | 56.9       | 74.1         | 41.6    | 51       |
| MPO count/mm <sup>2</sup> , median  |          | 15      | 11        | 22         | 7            | 19      | 15       |
| MPO/CD45 % median                   |          | 2.3     | 0.9       | 4          | 0.6          | 1.5     | 2        |
| PD-L1 (E1L3N) n (%)                 | Positive | 17 (21) | 2 (6)     | 0          | 0            | 0       | 19 (13)  |
|                                     | Negative | 64 (79) | 31 (94)   | 12 (100)   | 18 (100)     | 8 (100) | 133 (87) |

Abbreviations: lung adenocarcinoma (Lung-AC), breast carcinoma (Breast-Ca), ovarian carcinoma (Ovarian-Ca), gastro-intestinal carcinoma (GIT-Ca).

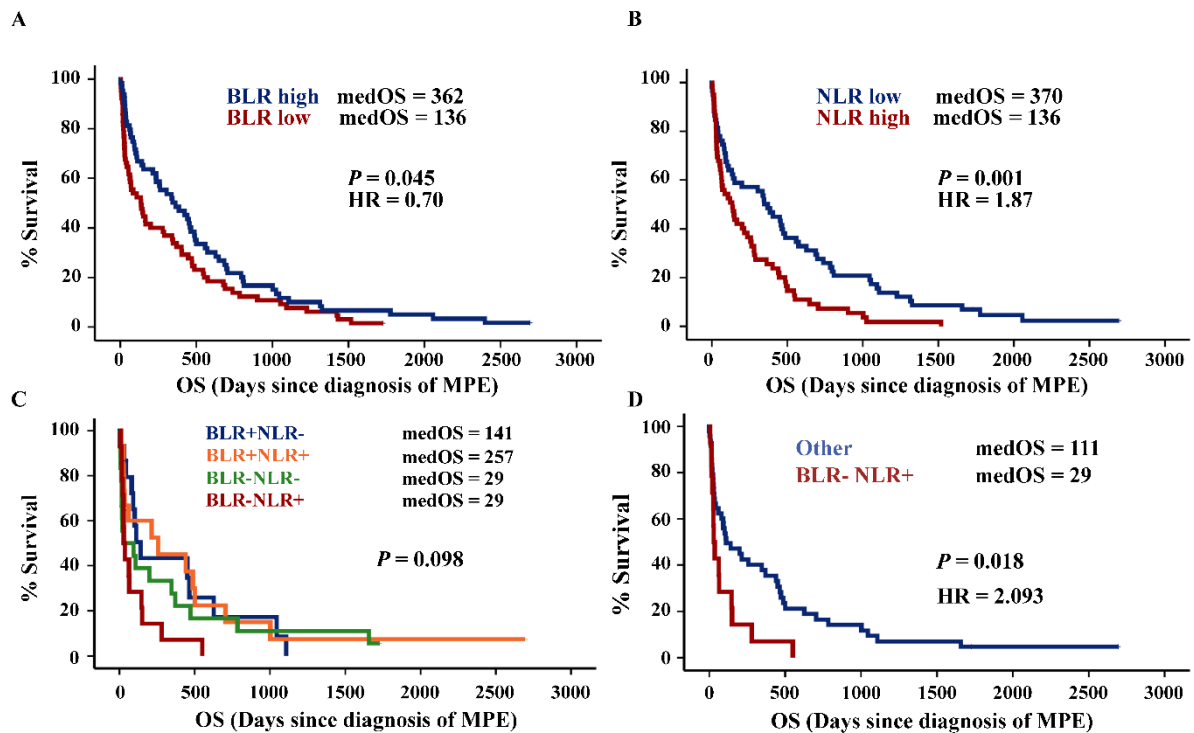

**Figure S1.** Survival analysis of BLR and NLR. Survival analysis of BLR (A) and NLR (B) without MPE GIT-Ca cases. Survival analysis of combined BLR/NLR data (four groups) (C) and BLR- NLR+ group vs. the rest “Other” group (D) for only MPE Lung-AC cases. The curves were separated by their median expressions, and correspondingly defined as “high” and “low”. Abbreviations: Hazard ratio (HR), B cells to leukocytes ratio (BLR), neutrophils to leukocytes ratio (NLR).

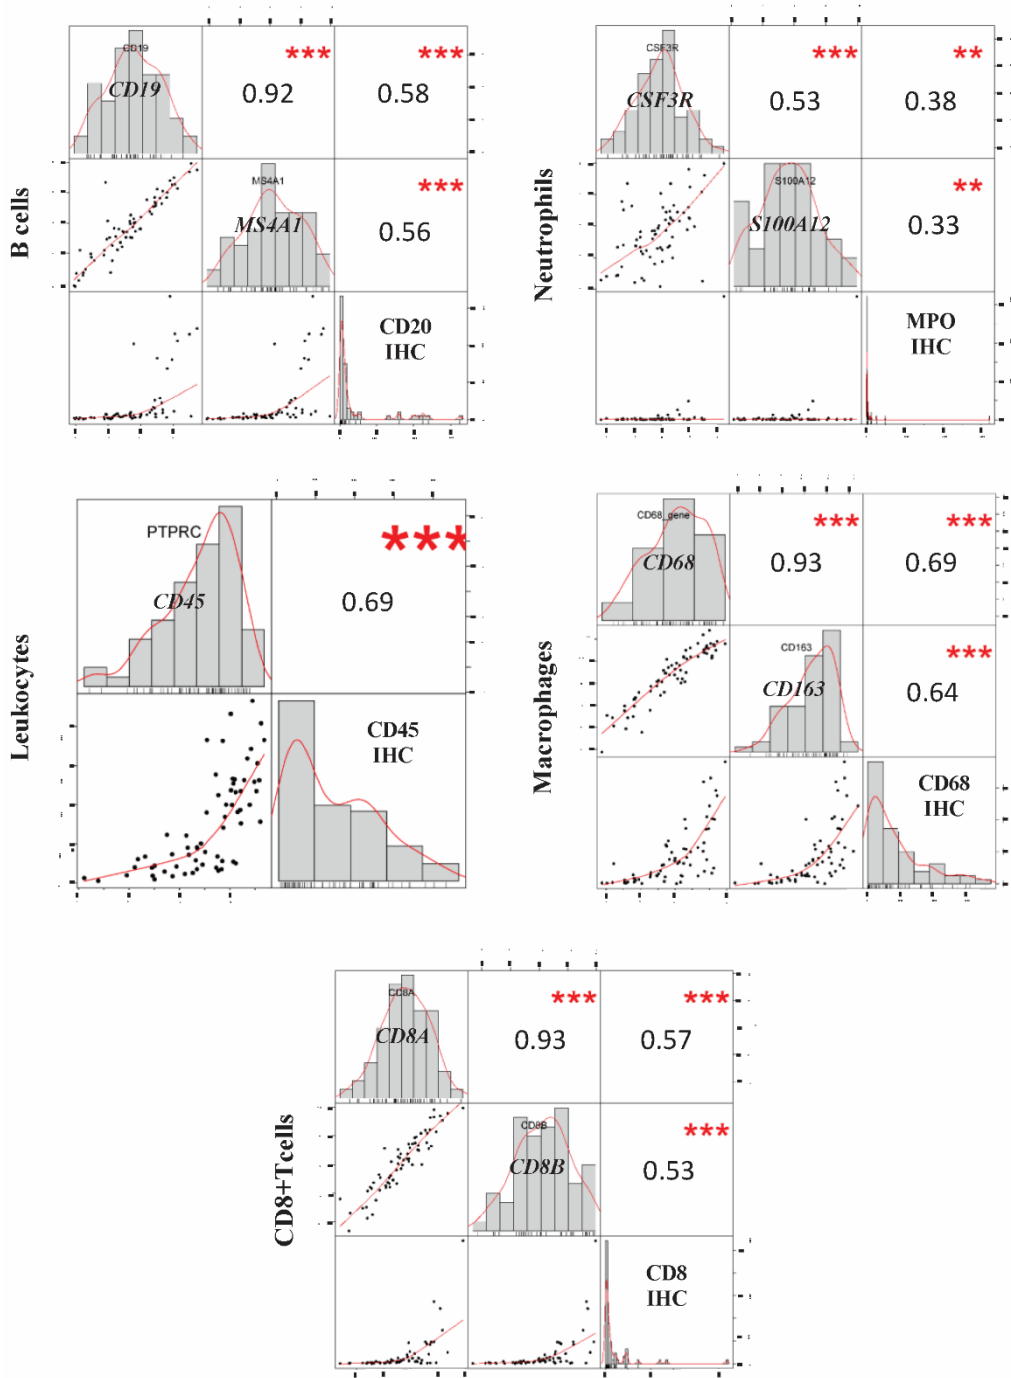

**Figure S2.** Immune cells-specific markers correlation analysis between computational IHC quantification and NanoString mRNA results. CD8, CD20, CD45, CD68, and MPO IHC results were correlated with corresponding mRNA expression levels. Coefficients and p-values were shown in the upper right squares. The unit of IHC quantification data is number/mm<sup>2</sup>. P-values are presented using \*\* (< 0.01) or \*\*\* (< 0.001).

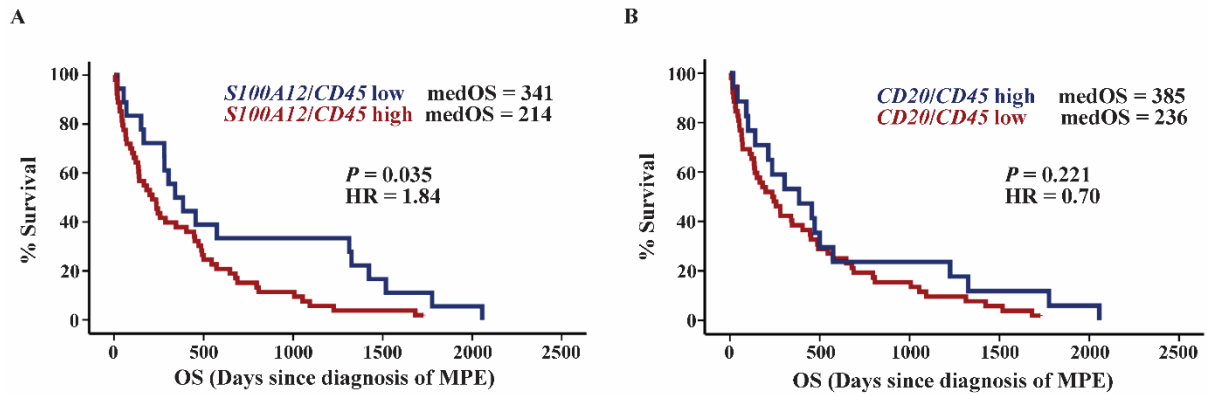

**Figure S3.** Survival analysis of S100A12/CD45 and CD20/CD45. (A) Kaplan-Meier survival analysis of MPE patients for S100A12/CD45. The curves were separated by the lower quartile of expressions, and correspondingly defined as “high” and “low”. (B) Kaplan-Meier survival analysis of MPE patients for CD20/CD45. The curves were separated by the upper quartile of expressions, and correspondingly defined as “high” and “low”. Abbreviations: Hazard ratio (HR), median overall survival (medOS).
